# Supplementary material for: Regulation of monocyte cell fate by blood vessels mediated by Notch signalling
Source: Nat Commun. 2016 Aug 31;7:12597. doi: 10.1038/ncomms12597 (PMC5013671; doi:10.1038/ncomms12597)
Supplement: Supplementary Information — Supplementary Figures 1-10 and Supplementary Tables 1-4 [file ncomms12597-s1.pdf]

## Supplementary Figure 1

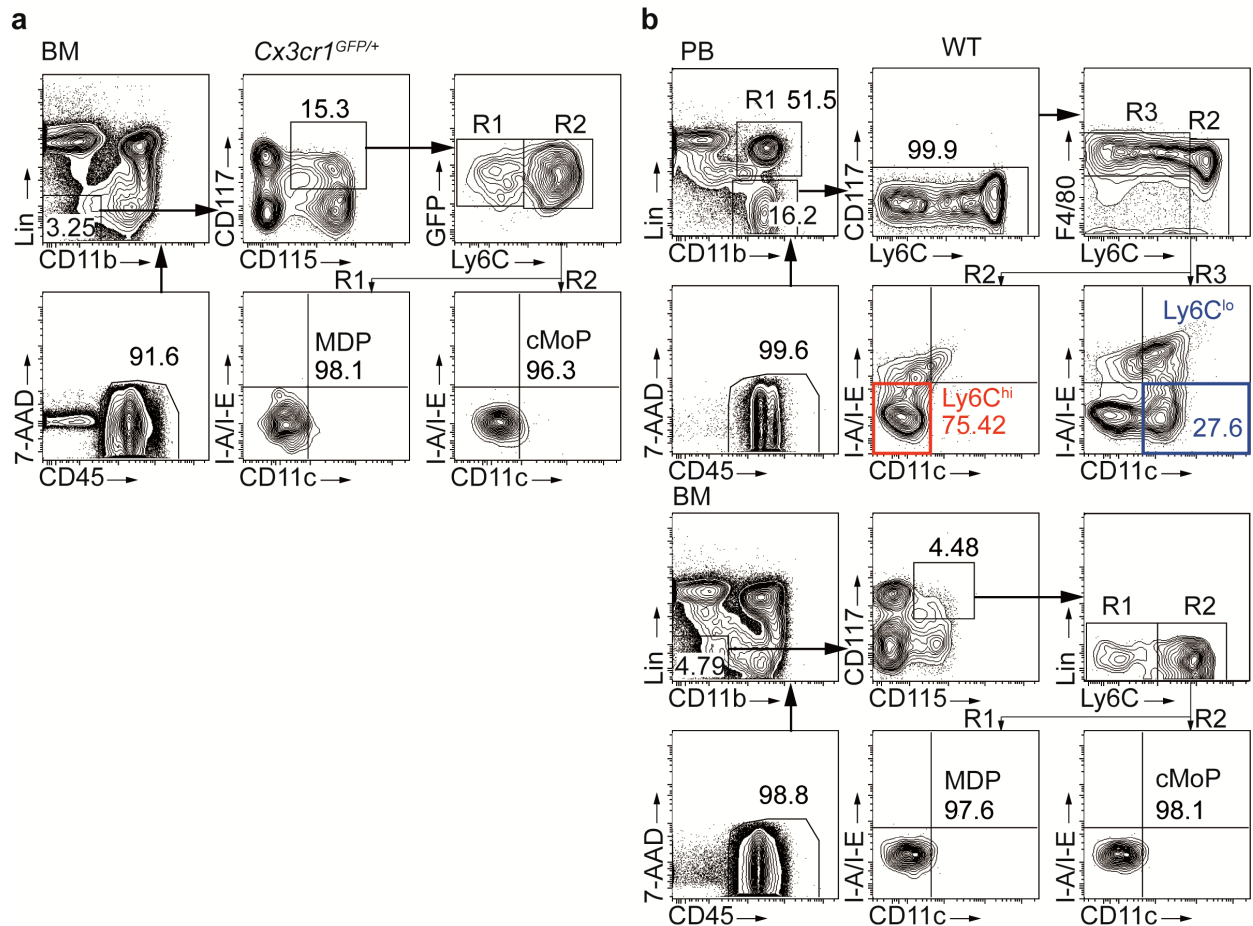

**Supplementary Figure 1: Analysis of monocyte subsets and lineage relationships.** (a) Gating strategy for definition of MDP and cMoP populations in BM of *Cx3cr1<sup>GFP/+</sup>* mice related to **Fig. 1a**. MDP was defined as CD11c<sup>-</sup>MHC-II<sup>-</sup> cells from live CD45<sup>+</sup>Lin<sup>-</sup>CD11b<sup>-</sup>CD117<sup>+</sup>CD115<sup>+</sup>GFP<sup>+</sup> population. For cMoP Ly6C<sup>+</sup>CD11c<sup>-</sup>MHC-II<sup>-</sup> subset was gated from live CD45<sup>+</sup>Lin<sup>-</sup>CD11b<sup>-</sup>CD117<sup>+</sup>CD115<sup>+</sup>GFP<sup>+</sup> population. (Lin: CD3, CD45R/B220, CD19, NK1.1, Ly6G, CD49b). (b) Gating strategy for identification of monocyte and GC (top) or MDP and cMoP (bottom) subpopulations in wild-type (*Cx3cr1<sup>+/+</sup>*) mice.

## Supplementary Figure 2

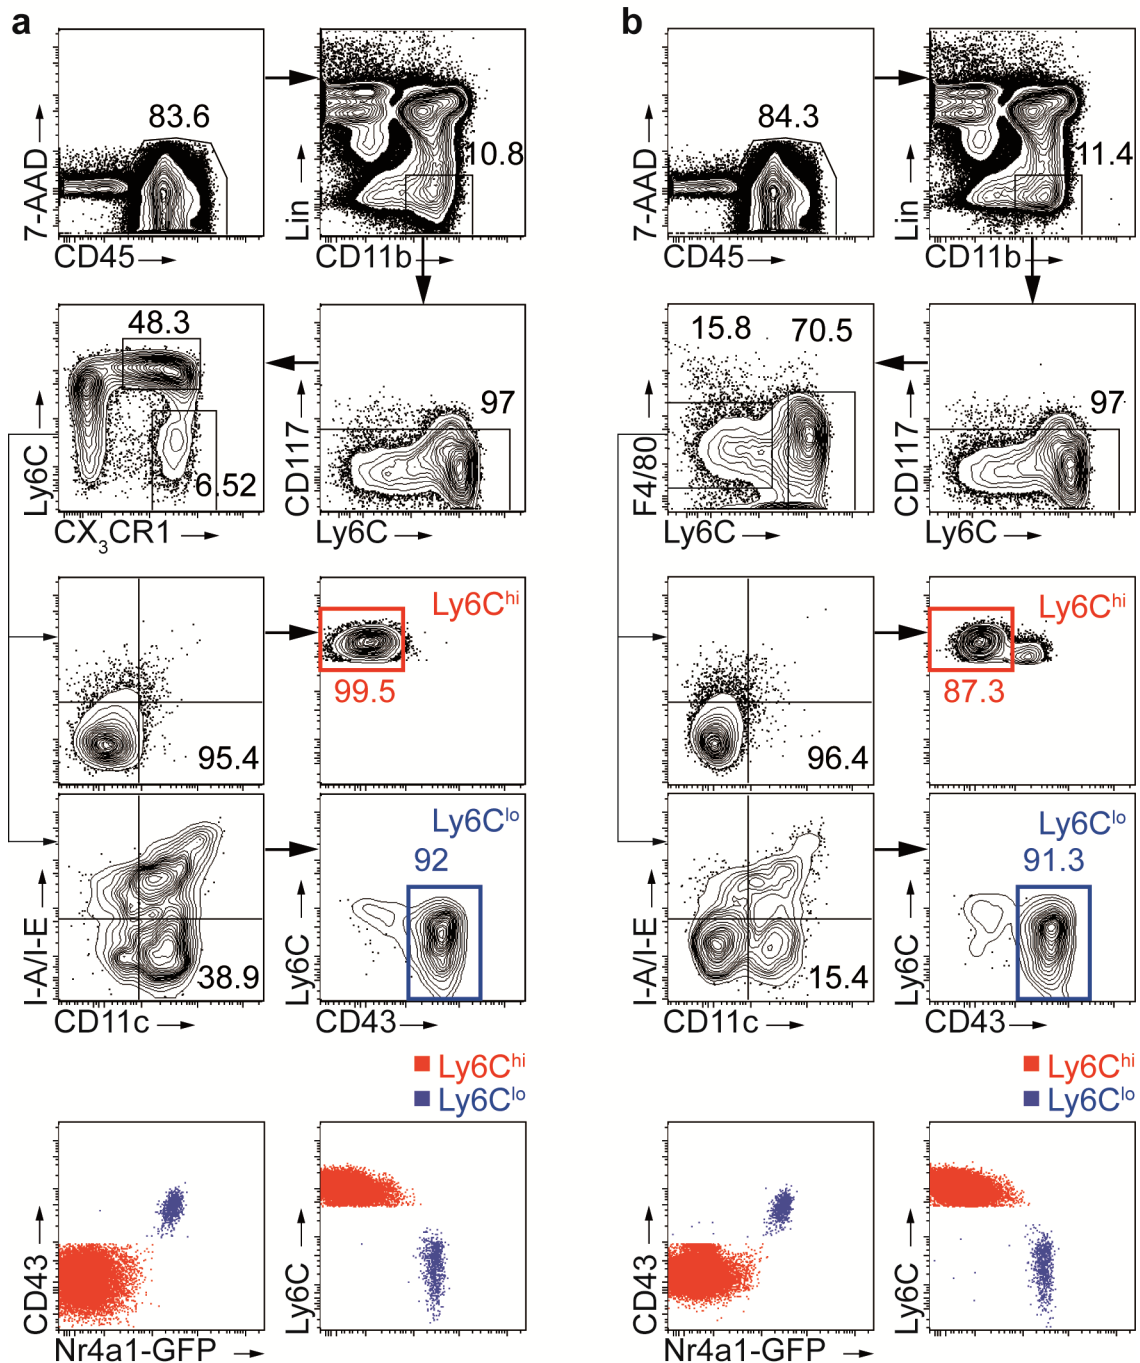

**Supplementary Figure 2: Validation of gating strategy in *Nr4a1-GFP* mice and adoptive transfer experiments.** (a) Flow cytometry plot depicting validation of CX<sub>3</sub>CR1 based gating strategy (corresponding to gating in *Cx3cr1*<sup>GFP/+</sup> mice, in **Fig. 1a**) precisely identifies Nr4a1-GFP<sup>+</sup>CD43<sup>+</sup>Ly6C<sup>lo/-</sup> monocytes in bone marrow. (b) Flow cytometry plot depicting validation of CX<sub>3</sub>CR1 independent gating strategy (corresponding to gating in wild type mice, in **Supplementary Fig 1b**) precisely defines Nr4a1-GFP<sup>+</sup>CD43<sup>+</sup>Ly6C<sup>lo/-</sup> monocytes.

## Supplementary Figure 3

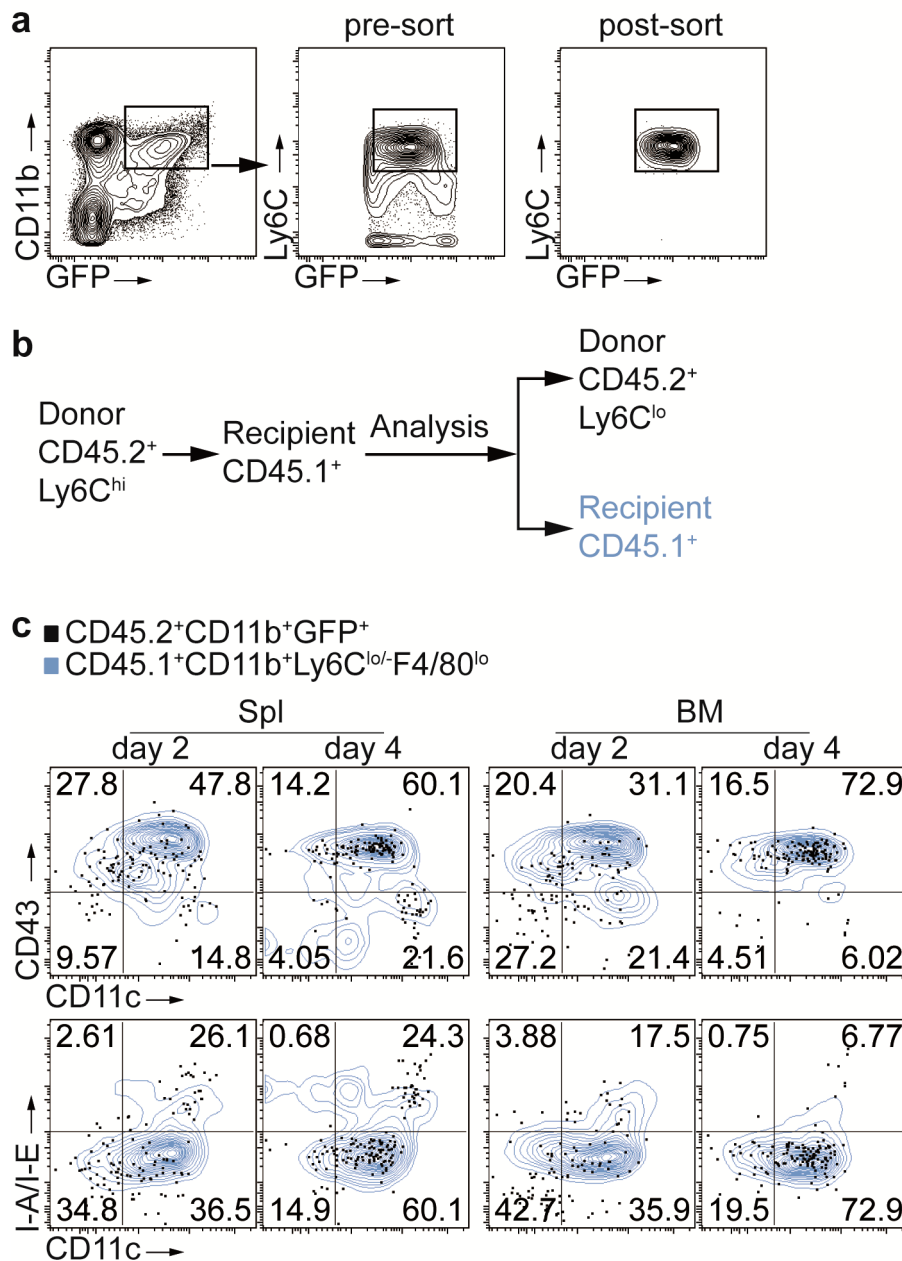

**Supplementary Figure 3: Ly6C<sup>hi</sup> monocyte adoptive transfer experiments.** (a) Sorting strategy for adoptive transfer of CD11b<sup>+</sup>GFP<sup>+</sup>Ly6C<sup>hi</sup> monocytes. (b) Schematic illustration of adoptive transfer and multicolor flow cytometry analysis of Ly6C<sup>hi</sup> monocytes from GFP<sup>+</sup>CD45.2<sup>+</sup> mice into CD45.1<sup>+</sup> recipients. (c) 4<sup>th</sup> and 5<sup>th</sup> rows of flow cytometry plots from **Fig. 1d** are shown. Donor CD45.2<sup>+</sup>CD11b<sup>+</sup>GFP<sup>+</sup> cells are black. For comparison CD45.1<sup>+</sup>CD11b<sup>+</sup>Ly6C<sup>lo/-</sup>F4/80<sup>lo</sup> recipient monocytes are depicted in blue (representative of two experiments).

## Supplementary Figure 4

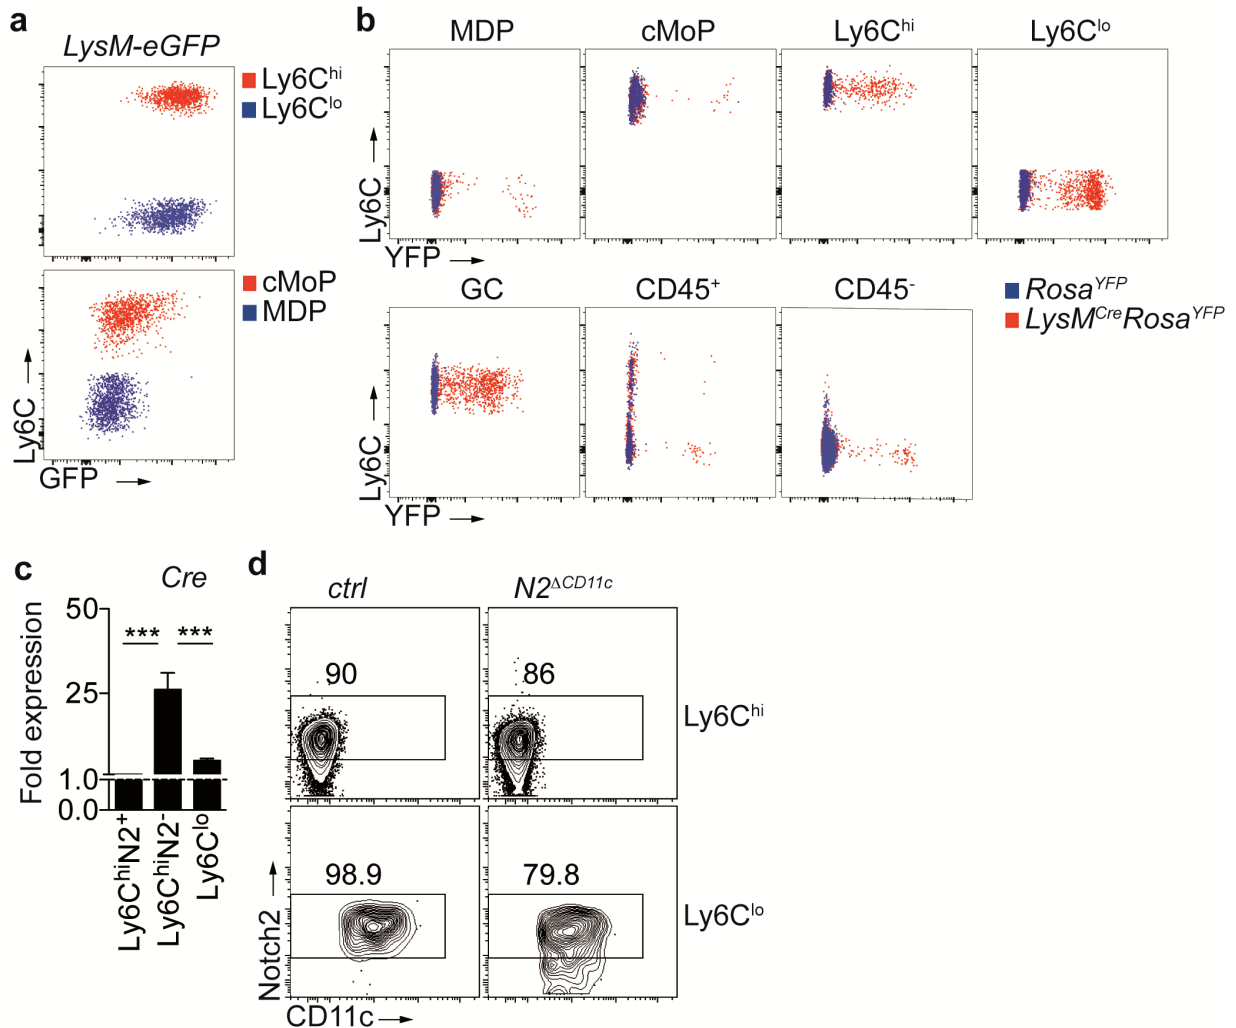

**Supplementary Figure 4: Specificity and efficiency of *Cre* expression and *Notch2* targeting.** (a) Flow cytometry plot showing gradual expression of *LysM-eGFP* in myeloid cell subpopulations from cMoP to Ly6C<sup>lo</sup> monocytes. (b) Flow cytometry plot showing YFP expression in bone marrow of *LysM<sup>Cre</sup>Rosa<sup>YFP</sup>* or control *Rosa<sup>YFP</sup>* mice. *LysM<sup>Cre</sup>* is strongly active in monocytes (Ly6C<sup>hi</sup> and Ly6C<sup>lo</sup>) and granulocytes but not in other cell populations. (c) Quantitative RT-PCR in sorted bone marrow cells from *GFP<sup>+</sup>Notch2<sup>ΔMy</sup>* mice showing highest expression of *Cre* in N2<sup>+</sup>Ly6C<sup>hi</sup> and subsequent reduction in Ly6C<sup>lo</sup> monocytes (n=6). \* *P*<0.05, \*\* *P*<0.01, \*\*\* *P*<0.001; 1way ANOVA with Bonferroni's multiple comparison test. Error bars represent s.e.m. (d) *Notch2* expression in Ly6C<sup>hi</sup> and Ly6C<sup>lo</sup> monocyte subpopulations isolated from BM of *Notch2<sup>ΔCD11c</sup>* mice (representative of two experiments). Littermate controls are shown for comparison.

### Supplementary Figure 5

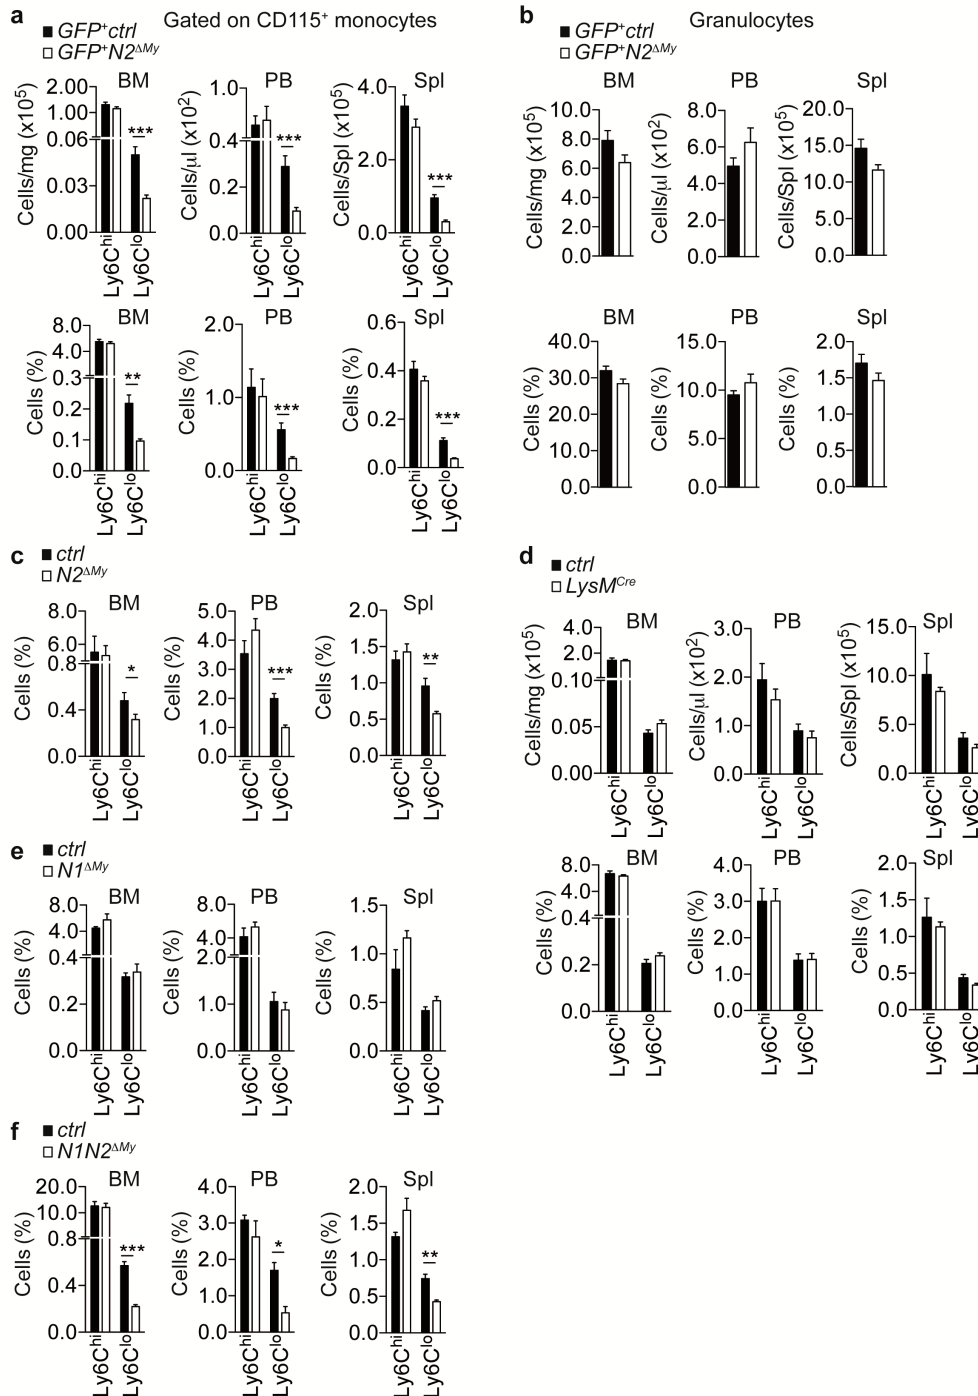

**Supplementary Figure 5: Myeloid cell populations in *Notch2* deficient mice.** (a) Monocyte subpopulation analysis based on  $CD115^{+}$  gating strategy reveals reduction of  $Ly6C^{lo}$  but not  $Ly6C^{hi}$  monocytes in  $GFP^{+}Notch2^{\Delta My}$  mice. Data are pooled from three experiments (n=8/11). (b) Absolute or relative numbers of granulocytes in  $GFP^{+}Notch2^{\Delta My}$  mice. Data are pooled from three experiments (n=8/10). (c) Relative frequency of monocytes by flow cytometry in *Notch2* $^{\Delta My}$  with wild-type *Cx3cr1* locus. Data are pooled from three experiments (n=9/11). (d) Myeloid cell populations in *LysM* $^{Cre}Notch2^{+/+}$  and *LysM* $^{+/+}Notch2^{+/+}$  littermate control mice. Data are from three experiments (n=7/8). (e) Myeloid cell population analysis in *N1* $^{\Delta My}$  mice (n=8/9). Data are pooled from three experiments. (f) Myeloid cell population analysis in *N1N2* $^{\Delta My}$  mice. Data are pooled from two experiments (n=5/6). (a-f) \*  $P < 0.05$ , \*\*  $P < 0.01$ , \*\*\*  $P < 0.001$ ; Student's t test. Error bars represent s.e.m.

## Supplementary Figure 6

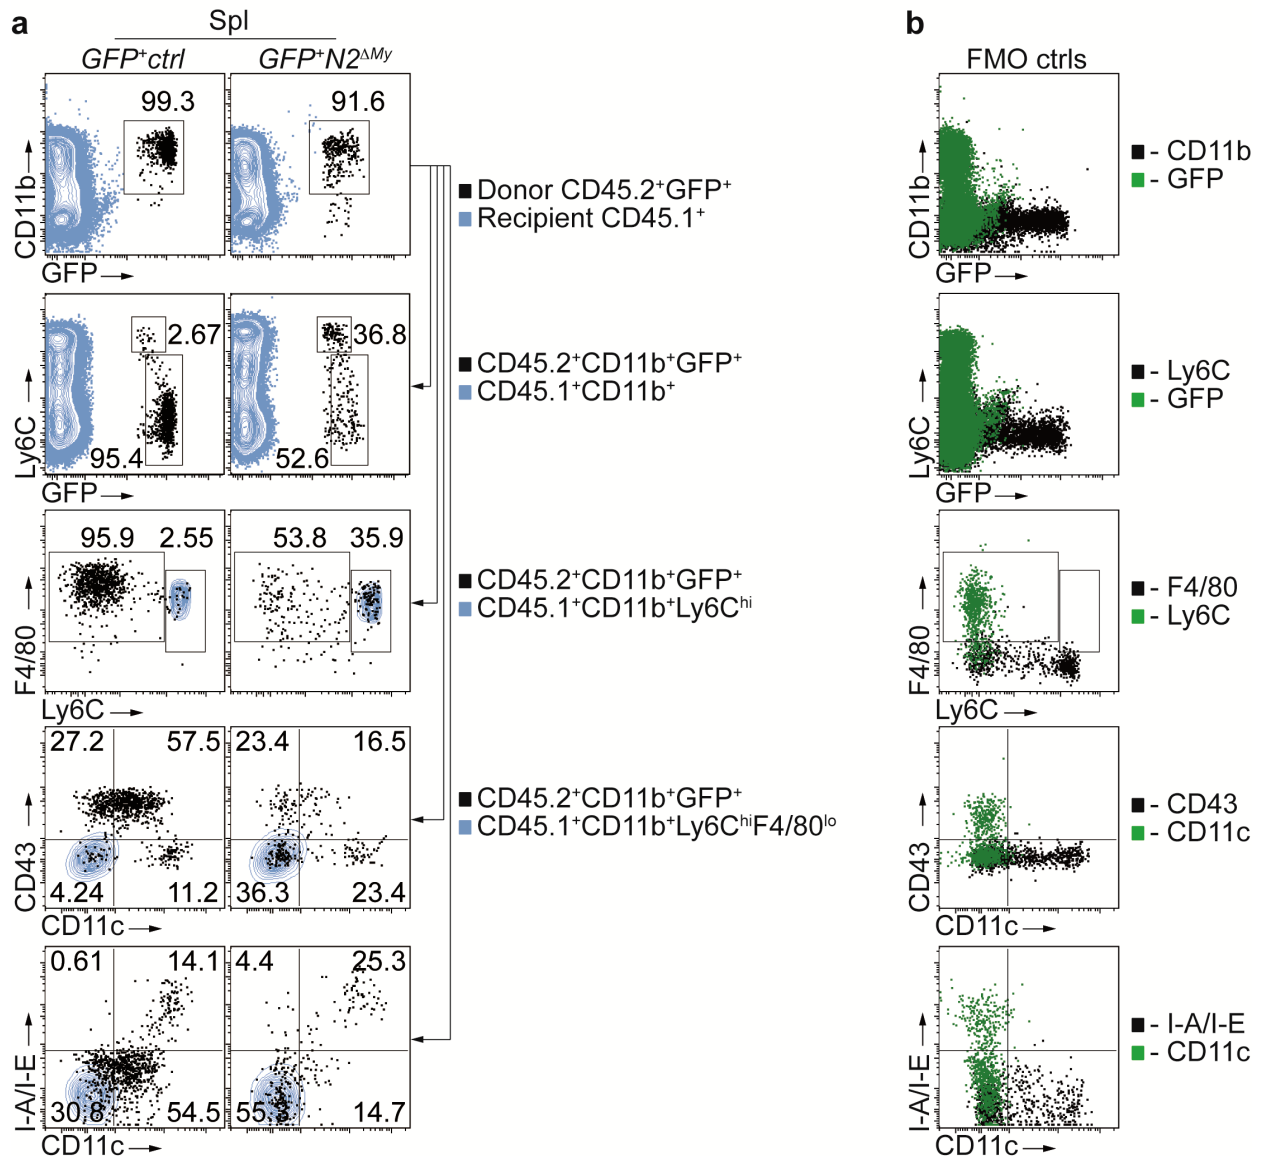

**Supplementary Figure 6: Notch2 deficient BM Ly6C<sup>hi</sup> monocytes show impaired conversion potential *in vivo*.** (a, b) Flow cytometry (a) and corresponding fluorescence minus one controls (FMO ctrls) (b) 4 days after adoptive transfer of Ly6C<sup>hi</sup> monocytes (corresponding to Fig. 4c) from control or Notch2 deficient CD45.2<sup>+</sup>GFP<sup>+</sup> donors into CD45.1<sup>+</sup> congenic recipients. (a) Transferred cells are shown in black and for comparison, recipient CD45.1<sup>+</sup> (1<sup>st</sup> row), CD45.1<sup>+</sup>CD11b<sup>+</sup> (2<sup>nd</sup> row), CD45.1<sup>+</sup>CD11b<sup>+</sup>Ly6C<sup>hi</sup> (3<sup>rd</sup> row) cells or CD45.1<sup>+</sup>CD11b<sup>+</sup>Ly6C<sup>hi</sup>F4/80<sup>lo</sup> monocytes (4<sup>th</sup> and 5<sup>th</sup> rows) are depicted in blue.

## Supplementary Figure 7

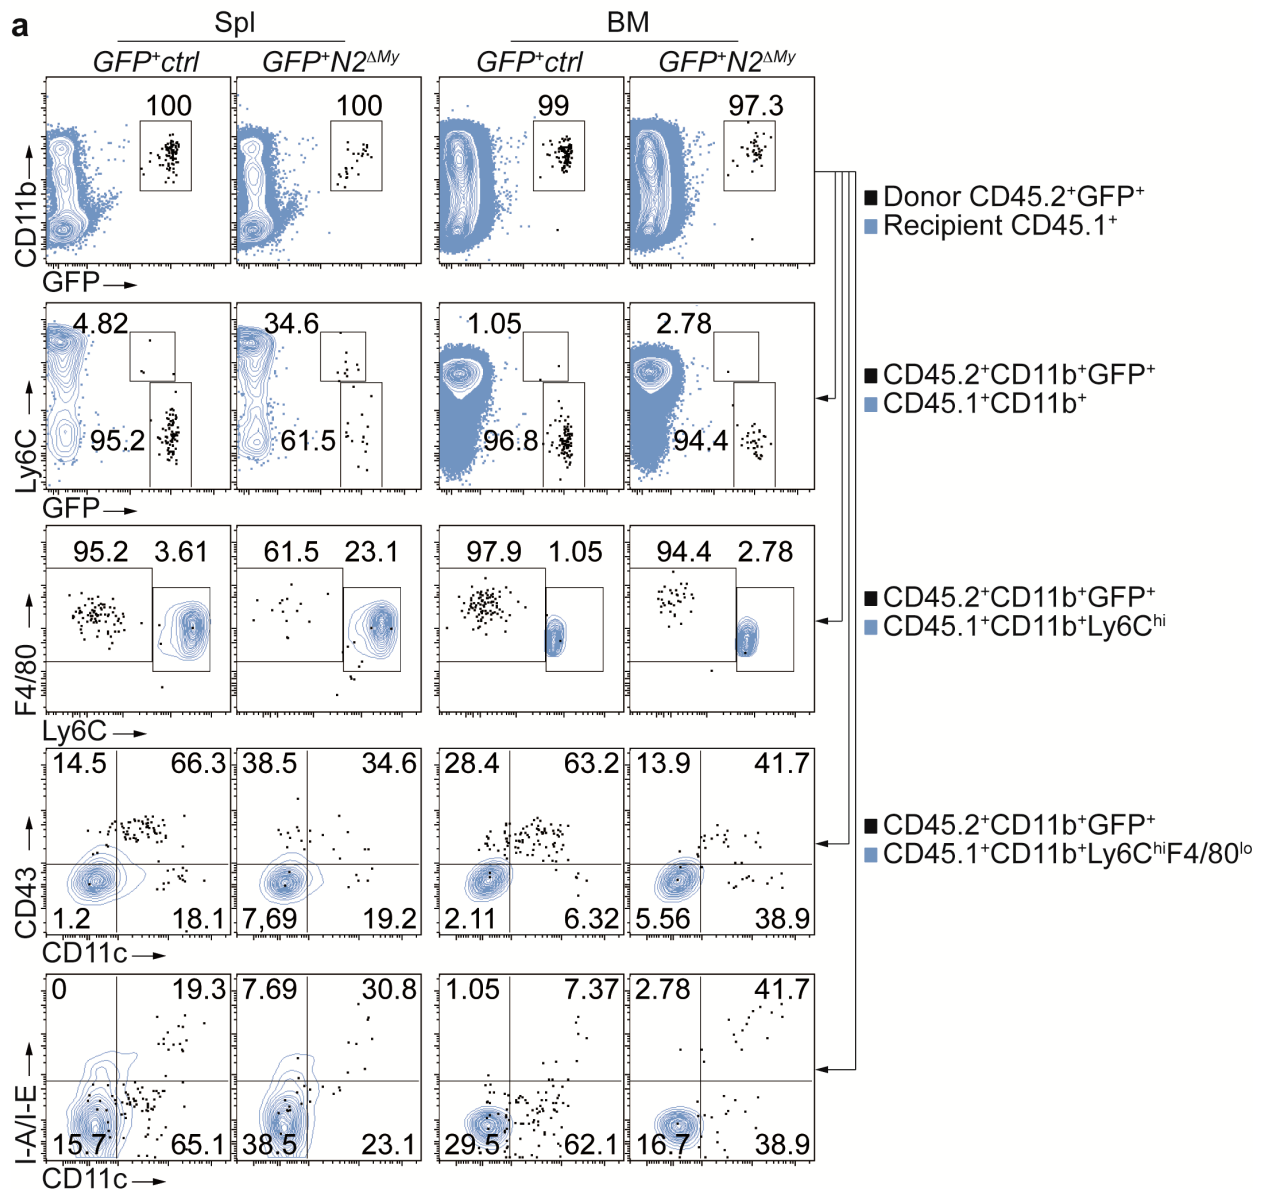

**Supplementary Figure 7: Notch2 deficient peripheral Ly6C<sup>hi</sup> monocytes show impaired conversion potential *in vivo*.** (a) Flow cytometry plots 4 days after adoptive transfer of pooled splenic and peripheral blood Ly6C<sup>hi</sup> monocytes from control or Notch2 deficient CD45.2<sup>+</sup>GFP<sup>+</sup> donors into CD45.1<sup>+</sup> congenic recipients. Transferred cells are shown in black and for comparison, recipient CD45.1<sup>+</sup> (1<sup>st</sup> row), CD45.1<sup>+</sup>CD11b<sup>+</sup> (2<sup>nd</sup> row), CD45.1<sup>+</sup>CD11b<sup>+</sup>Ly6C<sup>hi</sup> (3<sup>rd</sup> row) cells or CD45.1<sup>+</sup>CD11b<sup>+</sup>Ly6C<sup>hi</sup>F4/80<sup>lo</sup> monocytes (4<sup>th</sup> to 5<sup>th</sup> rows) are depicted in blue (representative of two experiments).

## Supplementary Figure 8

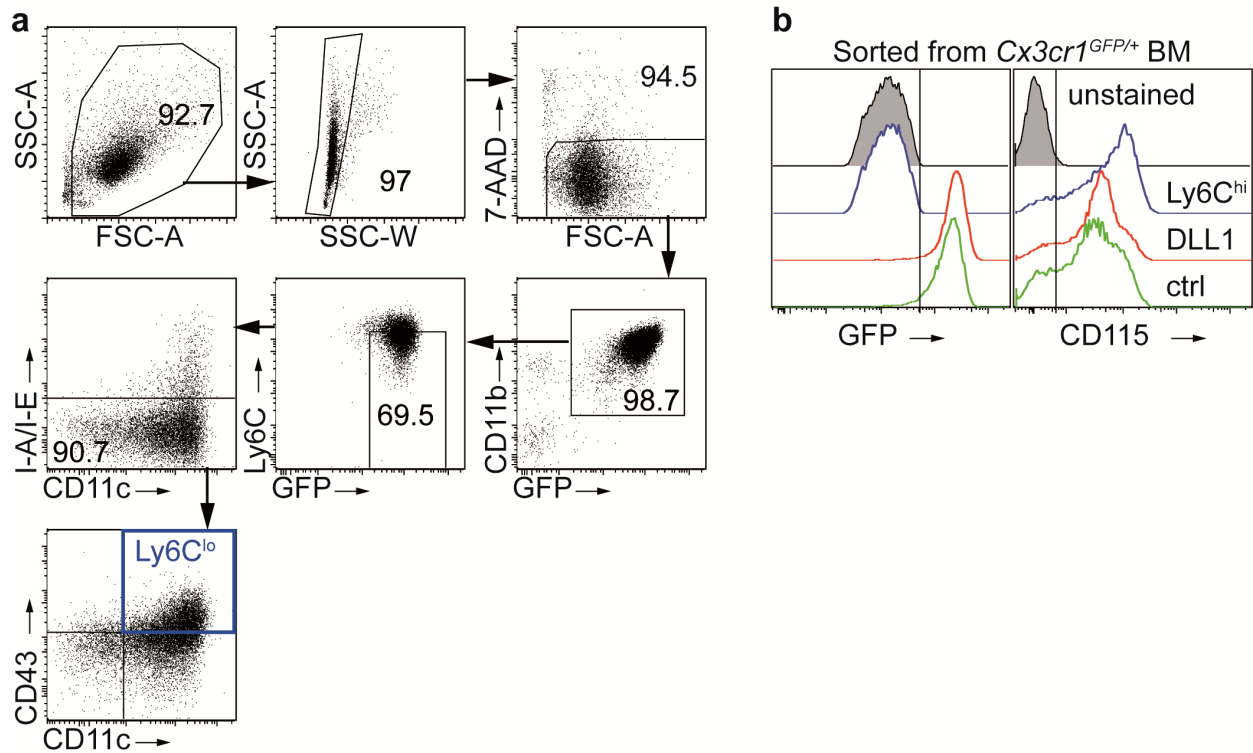

**Supplementary Figure 8: Notch ligand DLL1 mediates monocyte conversion *in vitro*.** (a) Gating strategy for definition and quantification of  $\text{Ly6C}^{\text{lo}}$  monocyte-like cells *in vitro*.  $\text{Ly6C}^{\text{lo}}$  monocyte-like cells ( $\text{CD11b}^+ \text{GFP}^+ \text{Ly6C}^{\text{lo}/-} \text{CD11c}^{\text{lo}} \text{CD43}^+ \text{MHC-II}^{\text{lo}/-}$ ) are calculated as a percentage of live  $\text{CD11b}^+ \text{GFP}^+$  cells. (b) Flow cytometry plot showing expression of CD115 and upregulation of GFP on *in vitro* converted  $\text{Ly6C}^{\text{lo}}$  monocyte-like cells. *Ex vivo* isolated  $\text{GFP}^+ \text{Ly6C}^{\text{hi}}$  BM monocytes served as a staining control.

**Supplementary Figure 9**

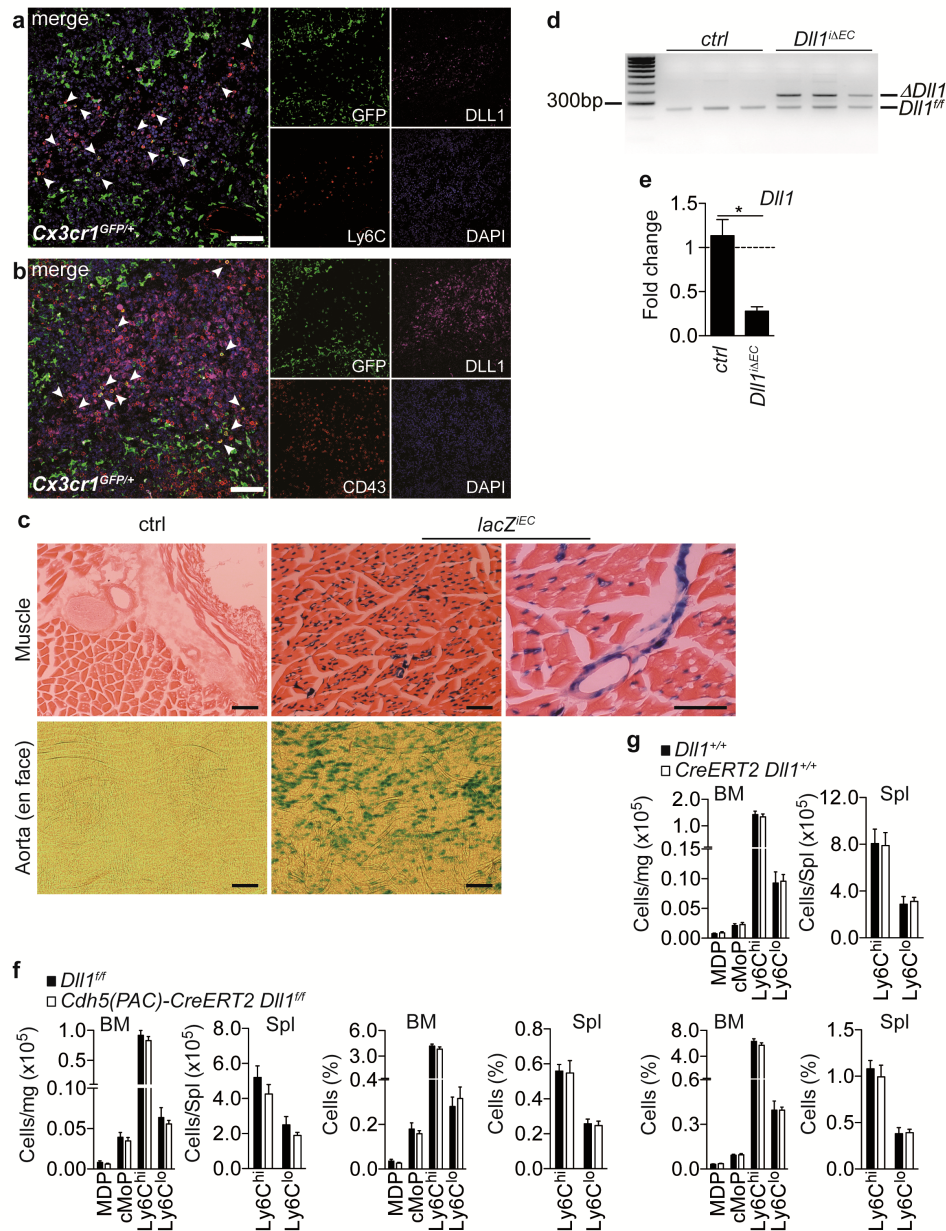

**Supplementary Figure 9: *In vivo* targeting of endothelial cells in mice.** b(c) Specific  $\beta$ -galactosidase activity in capillaries and large vessels of peripheral muscle (top) and in aortic EC (en face preparations (bottom)) after treatment of *lacZ<sup>IEC</sup>* or control mice with tamoxifen; scale bar 100 $\mu$ m. Image is a representative of two (muscle) or three (aorta) experiments. (d) PCR for floxed or recombined locus of *Dll1* from heart (left), lung (middle) and peripheral muscle (right). Results are from one experiment representative of 4 experiments. (e) Quantitative RT-PCR analysis of *Dll1* expression in sorted ECs from control or *Dll1<sup>ΔEC</sup>* mice. Pooled from three experiments (n=3). (f) Myeloid cell population analysis in *Dll1<sup>+/+</sup>* or *CreERT2 Dll1<sup>+/+</sup>* mice after tamoxifen treatment showing no influence of tamoxifen on Ly6C<sup>lo</sup> monocyte development. Data are pooled from two experiments (n=6/7). (g) Cell population analysis in *Cdh5(PAC)-CreERT2 Dll1<sup>fl/fl</sup>* mice showing no influence of *Cdh5(PAC)-CreERT2* expression on Ly6C<sup>lo</sup> monocyte development. Data are pooled from three experiments (n=6/8). (e-g) \*  $P < 0.05$ , \*\*  $P < 0.01$ , \*\*\*  $P < 0.001$ ; Student's t test. Error bars represent s.e.m.

## Supplementary Figure 10

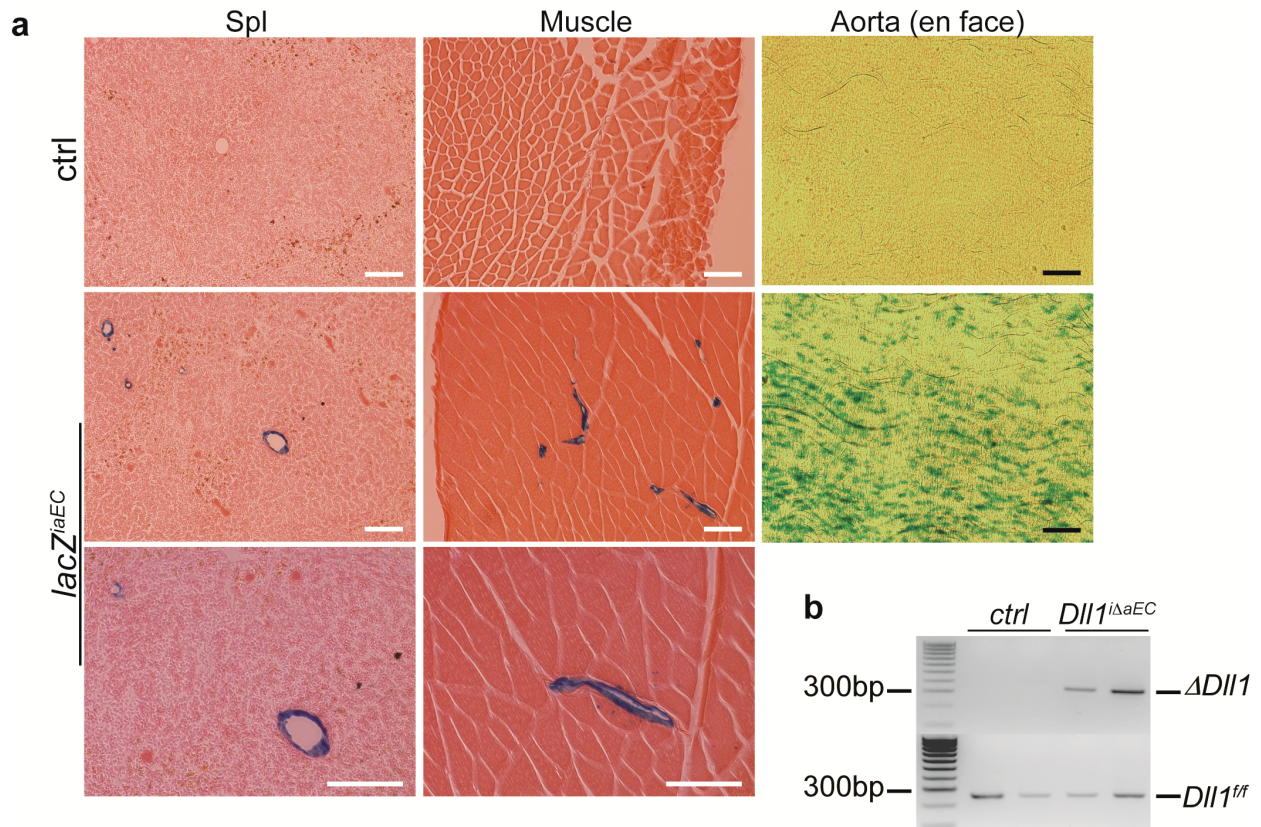

**Supplementary Figure 10: *In vivo* targeting of arterial endothelial cells in mice.** (a)  $\beta$ -galactosidase staining demonstrates specific staining in central arteries of splenic follicles, arteries of peripheral muscle and aorta in *lacZ<sup>iaEC</sup>* mice. Scale bars 100 $\mu$ m. Results are from one experiment representative of two independent experiments. (b) PCR for floxed or recombined *Dll1* locus ( $\Delta Dll1$ ) from aortas (n=2).

**Supplementary Table 1: Surface phenotype signatures for identification of distinct myeloid populations *in vivo***

| Population                              | Phenotype                                                                                                                                                                                                                                                                                                                                                            |
|-----------------------------------------|----------------------------------------------------------------------------------------------------------------------------------------------------------------------------------------------------------------------------------------------------------------------------------------------------------------------------------------------------------------------|
| MDP                                     | Lin <sup>-</sup> CD117 <sup>+</sup> CD11b <sup>-</sup> CD115 <sup>+</sup> CX <sub>3</sub> CR1 <sup>+</sup> Ly6C <sup>-</sup> F4/80 <sup>-</sup> CD11c <sup>-</sup> MHC-II <sup>-</sup><br>or<br>Lin <sup>-</sup> CD117 <sup>+</sup> CD11b <sup>-</sup> CD115 <sup>+</sup> Ly6C <sup>-</sup> F4/80 <sup>-</sup> CD11c <sup>-</sup> MHC-II <sup>-</sup>                |
| cMoP                                    | Lin <sup>-</sup> CD117 <sup>+</sup> CD11b <sup>-</sup> CD115 <sup>+</sup> CX <sub>3</sub> CR1 <sup>+</sup> Ly6C <sup>hi</sup> F4/80 <sup>-</sup> CD11c <sup>-</sup> MHC-II <sup>-</sup><br>or<br>Lin <sup>-</sup> CD117 <sup>+</sup> CD11b <sup>-</sup> CD115 <sup>+</sup> Ly6C <sup>hi</sup> F4/80 <sup>-</sup> CD11c <sup>-</sup> MHC-II <sup>-</sup>              |
| Ly6C <sup>hi</sup>                      | Lin <sup>-</sup> CD117 <sup>-</sup> CD11b <sup>+</sup> CX <sub>3</sub> CR1 <sup>lo</sup> Ly6C <sup>hi</sup> F4/80 <sup>lo/-</sup> CD11c <sup>-</sup> MHC-II <sup>lo/-</sup> CD43 <sup>-</sup><br>or<br>Lin <sup>-</sup> CD117 <sup>-</sup> CD11b <sup>+</sup> Ly6C <sup>hi</sup> F4/80 <sup>lo/-</sup> CD11c <sup>-</sup> MHC-II <sup>lo/-</sup> CD43 <sup>-</sup>   |
| Ly6C <sup>lo</sup>                      | Lin <sup>-</sup> CD117 <sup>-</sup> CD11b <sup>+</sup> CX <sub>3</sub> CR1 <sup>hi</sup> Ly6C <sup>lo/-</sup> F4/80 <sup>lo</sup> CD11c <sup>lo</sup> MHC-II <sup>lo/-</sup> CD43 <sup>+</sup><br>or<br>Lin <sup>-</sup> CD117 <sup>-</sup> CD11b <sup>+</sup> Ly6C <sup>lo/-</sup> F4/80 <sup>lo</sup> CD11c <sup>lo</sup> MHC-II <sup>lo/-</sup> CD43 <sup>+</sup> |
| GC                                      | Lin <sup>+</sup> CD11b <sup>+</sup> CX <sub>3</sub> CR1 <sup>-</sup> Ly6C <sup>lo</sup><br>or<br>Lin <sup>+</sup> CD11b <sup>+</sup> Ly6C <sup>lo</sup>                                                                                                                                                                                                              |
| Atypical cells<br>(Ly6C <sup>lo</sup> ) | Lin <sup>-</sup> CD117 <sup>-</sup> CD11b <sup>+</sup> CX <sub>3</sub> CR1 <sup>hi</sup> Ly6C <sup>lo/-</sup> F4/80 <sup>lo</sup> CD11c <sup>-</sup> MHC-II <sup>hi</sup> CD43 <sup>-</sup><br>or<br>Lin <sup>-</sup> CD117 <sup>-</sup> CD11b <sup>+</sup> Ly6C <sup>lo/-</sup> F4/80 <sup>lo</sup> CD11c <sup>-</sup> MHC-II <sup>hi</sup> CD43 <sup>-</sup>       |

Lin: CD3, CD45R/B220, CD19, NK1.1, Ly6G, CD49b

**Supplementary Table 2: Mouse models used in the study**

| Abbreviations                                           | Mouse description                                                                                                               | Mouse background |
|---------------------------------------------------------|---------------------------------------------------------------------------------------------------------------------------------|------------------|
| CD45.1 <sup>+</sup>                                     | B6.SJL- <i>Ptprc</i> <sup>a</sup> <i>Peptc</i> <sup>b</sup> /BoyJ                                                               | B6               |
| <i>GFP</i> <sup>+</sup> <i>ctrl</i>                     | <i>LysM</i> <sup>+/+</sup> <i>Notch2</i> <sup>lox/lox</sup> <i>Cx3cr1</i> <sup>GFP/+</sup>                                      | B6               |
| <i>GFP</i> <sup>+</sup> <i>N2</i> <sup>ΔMy</sup>        | <i>LysM</i> <sup>Cre</sup> <i>Notch2</i> <sup>lox/lox</sup> <i>Cx3cr1</i> <sup>GFP/+</sup>                                      | B6               |
| <i>Ctrl</i>                                             | <i>LysM</i> <sup>+/+</sup> <i>Notch2</i> <sup>lox/lox</sup>                                                                     | B6               |
| <i>N2</i> <sup>ΔMy</sup>                                | <i>LysM</i> <sup>Cre</sup> <i>Notch2</i> <sup>lox/lox</sup>                                                                     | B6               |
| <i>Ctrl</i>                                             | <i>LysM</i> <sup>+/+</sup> <i>Notch1</i> <sup>lox/lox</sup>                                                                     | B6               |
| <i>N1</i> <sup>ΔMy</sup>                                | <i>LysM</i> <sup>Cre</sup> <i>Notch1</i> <sup>lox/lox</sup>                                                                     | B6               |
| <i>Ctrl</i>                                             | <i>LysM</i> <sup>+/+</sup> <i>Notch1</i> <sup>lox/lox</sup> <i>Notch2</i> <sup>lox/lox</sup>                                    | B6               |
| <i>N1N2</i> <sup>ΔMy</sup>                              | <i>LysM</i> <sup>Cre</sup> <i>Notch1</i> <sup>lox/lox</sup> <i>Notch2</i> <sup>lox/lox</sup>                                    | B6               |
| <i>wt</i>                                               | <i>Dll1</i> <sup>+/+</sup>                                                                                                      | 129              |
| <i>Dll1</i> <sup>+/lacZ</sup>                           | <i>Dll1</i> <sup>+/lacZ</sup>                                                                                                   | 129              |
| <i>Ctrl</i>                                             | <i>Gt(ROSA)26Sor</i>                                                                                                            | B6               |
| <i>lacZ</i> <sup>iEC</sup>                              | <i>Cdh5(PAC)-CreERT2</i>                                                                                                        | B6               |
| <i>lacZ</i> <sup>iaEC</sup>                             | <i>Gt(ROSA)26Sor</i><br><i>Bmx(PAC)-CreERT2</i><br><i>Gt(ROSA)26Sor</i>                                                         | B6               |
| <i>Ctrl</i>                                             | <i>Dll1</i> <sup>lox/lox</sup>                                                                                                  | Mixed, B6;129    |
| <i>Dll1</i> <sup>iΔEC</sup>                             | <i>Cdh5(PAC)-CreERT2</i> <i>Dll1</i> <sup>lox/lox</sup>                                                                         | Mixed, B6;129    |
| <i>Dll1</i> <sup>iΔaEC</sup>                            | <i>Bmx(PAC)-CreERT2</i> <i>Dll1</i> <sup>lox/lox</sup>                                                                          | Mixed, B6;129    |
| <i>Ctrl</i>                                             | <i>Dll4</i> <sup>lox/lox</sup>                                                                                                  | Mixed, B6;CD1    |
| <i>Dll4</i> <sup>iΔEC</sup>                             | <i>Cdh5(PAC)-CreERT2</i> <i>Dll4</i> <sup>lox/lox</sup>                                                                         | Mixed, B6;CD1    |
| <i>Dll1</i> <sup>+/+</sup>                              | <i>Dll1</i> <sup>+/+</sup>                                                                                                      | Mixed, B6;129    |
| <i>CreERT2</i> <i>Dll1</i> <sup>+/+</sup>               | <i>Cdh5(PAC)-CreERT2</i> <i>Dll1</i> <sup>+/+</sup>                                                                             | Mixed, B6;129    |
| <i>Ctrl</i>                                             | <i>LysM</i> <sup>+/+</sup> <i>Notch2</i> <sup>+/+</sup>                                                                         | B6               |
| <i>LysM</i> <sup>Cre</sup>                              | <i>LysM</i> <sup>Cre</sup> <i>Notch2</i> <sup>+/+</sup>                                                                         | B6               |
| <i>Nr4a1-GFP</i>                                        | <i>Nr4a1-EGFP/Cre</i>                                                                                                           | B6               |
| <i>LysM-eGFP</i>                                        | <i>LysM-EGFP</i>                                                                                                                | B6               |
| <i>Rosa</i> <sup>YFP</sup>                              | <i>LysM</i> <sup>+/+</sup> <i>Gt(ROSA)YFP26Sor</i>                                                                              | B6               |
| <i>LysM</i> <sup>Cre</sup> ; <i>Rosa</i> <sup>YFP</sup> | <i>LysM</i> <sup>Cre</sup> <i>Gt(ROSA)YFP26Sor</i>                                                                              | B6               |
| <i>GFP</i> <sup>+</sup> <i>ctrl</i>                     | <i>CD11c</i> <sup>Cre</sup> <i>Notch1</i> <sup>lox/+</sup> <i>Notch2</i> <sup>lox/+</sup><br><i>Cx3cr1</i> <sup>GFP/+</sup>     | B6               |
| <i>GFP</i> <sup>+</sup> <i>N1N2</i> <sup>ΔCD11c</sup>   | <i>CD11c</i> <sup>Cre</sup> <i>Notch1</i> <sup>lox/lox</sup> <i>Notch2</i> <sup>lox/lox</sup><br><i>Cx3cr1</i> <sup>GFP/+</sup> | B6               |
| <i>Ctrl</i>                                             | <i>CD11c</i> <sup>+/+</sup> <i>Notch2</i> <sup>lox/lox</sup>                                                                    | B6               |
| <i>N2</i> <sup>ΔCD11c</sup>                             | <i>CD11c</i> <sup>Cre</sup> <i>Notch2</i> <sup>lox/lox</sup>                                                                    | B6               |

**Supplementary Table 3: Antibodies and fluorescence dyes for flow cytometry and immunofluorescence used in the study**

| <b>Antibody/dye</b>          | <b>Clone</b> | <b>Dilution</b> | <b>Company</b>         |
|------------------------------|--------------|-----------------|------------------------|
| Anti-CD3ε                    | 145-2C11     | 1:100           | BioLegend              |
| Anti-CD49b                   | DX5          | 1:400           | BioLegend              |
| Anti-CD45R/B220              | RA3-6B2      | 1:400           | BioLegend              |
| Anti-Ly6G                    | 1A8          | 1:400           | BioLegend              |
| Anti-CD19                    | 1D3          | 1:400           | BD Pharmingen          |
| Anti-NK1.1                   | PK136        | 1:400           | BioLegend              |
| Anti-CD117                   | 2B8          | 1:100           | BioLegend              |
| Anti-CD115                   | AFS98        | 1:100           | BioLegend              |
| Anti-CD11b                   | M1/70        | 1:400           | BioLegend              |
| Anti-Ly6C                    | HK1.4        | 1:2800          | BioLegend              |
| Anti-F4/80                   | BM8          | 1:100           | BioLegend              |
| Anti-CD11c                   | N418         | 1:400           | BioLegend              |
| Anti-I-A/I-E                 | M5/114.15.2  | 1:400           | BioLegend              |
| Anti-CD43                    | S7           | 1:400           | BD Pharmingen          |
| Anti-CD45                    | 30-F11       | 1:200           | BioLegend              |
| Anti-CD45.1                  | A20          | 1:100           | BioLegend              |
| Anti-CD45.2                  | 104          | 1:200           | BioLegend              |
| Anti-CD144                   | 11D4.1       | 1:100           | BD Pharmingen          |
| Anti-CX <sub>3</sub> CR1     | SA011F11     | 1:200           | BioLegend              |
| Anti-CD11a                   | M17/4        | 1:200           | BioLegend              |
| Anti-CCR2                    | 475301       | 1:100           | R&D                    |
| Anti-Notch2                  | HMN2-35      | 1:100           | BioLegend              |
| Anti-CD16/CD32               | 93           | 1:200           | BioLegend              |
| Anti-CD31                    | Mec13.3      | 1:400           | BD Pharmingen          |
| Streptavidin<br>PE-Dazzle594 |              | 1:400           | BioLegend              |
| Annexin V                    |              | 1:50            | BioLegend              |
| 7AAD                         |              | 1:100           | BioLegend              |
| Propidium Iodide             |              | 1:12000         | Sigma                  |
| Anti-GFP                     |              | 1:300           | Acris                  |
| Anti-DLL1                    | HMD1-3       | 1:100           | BioLegend              |
| Streptavidin Cy3             |              | 1:400           | BioLegend              |
| Anti-rabbit IgG-FITC         |              | 1:200           | Jackson ImmunoResearch |
| DAPI                         |              | 1:5000          | Invitrogen             |

**Supplementary Table 4: Primers for QRT-PCR**

| <b>Gene</b>   | <b>Primers</b>                                                            |
|---------------|---------------------------------------------------------------------------|
| <i>Notch2</i> | Forward: AGTGTCTCAGAGGCCAGCAAGAAGAA<br>Reverse: TGATTGTCGTCCATCAGAGCACCA  |
| <i>Notch1</i> | Forward: TGGAGGTCTCAGTGGCTATAA<br>Reverse: ATTCTGGCATGGGTTAGAAAGA         |
| <i>Hey2</i>   | Forward: TGAAGCGCCCTTGTGAGGAA<br>Reverse: TTGTAGCGTGCCCAGGGTAA            |
| <i>Hes1</i>   | Forward: CCGGACAAACCAAAGACGGC<br>Reverse: GGAATGCCGGGAGCTATCTTTCT         |
| <i>Dll1</i>   | Forward: TCCGATTCCCCTTCGGCTTC<br>Reverse: TGGGTTTTCTGTTGCGAGGT            |
| <i>Nr4a1</i>  | Forward: AGCTTGGGTGTTGATGTTCC<br>Reverse: AATGCGATTCTGCAGCTCTT            |
| <i>Pparg</i>  | Forward: AGGGCGATCTTGACAGGAA<br>Reverse: CACCTCTTTGCTCTGCTCCT             |
| <i>Pou2f2</i> | Forward: TGCACATGGAGAAGGAAGTG<br>Reverse: AGCTTGGGACAATGGTAAGG            |
| <i>Slfn5</i>  | Forward: AGGTCGAACGATTCTGCTGT<br>Reverse: TCTGAGGGAACTGGAAAGG             |
| <i>Ccr2</i>   | Forward: CCTTGGGAATGAGTAACTGTGTGAT<br>Reverse: ATGGAGAGATACCTTCGGAACCTTCT |
| <i>Cx3cr1</i> | Forward: GCAGAAGTTCCCTTCCCATC<br>Reverse: GGACAGGAAGATGGTTCCAA            |
